# Supplementary material for: Epidemiological factors associated with revision of total joint replacement surgery: A nested case-control study
Source: Research Square preprint supplement (doi:10.21203/rs.3.rs-1647146/v1), 2022-05-19
Supplement: Supplementary file 1 [file 65be6aa78631ba7bbd8dcd0d.docx]

| **Variables** | |
| --- | --- |
| Congenital heart disease | Migraine |
| Coronary heart disease | Cancer |
| Heart Attack | Gout |
| Angina | Paget's disease |
| DVT | Bunions |
| VV | Medial epicondylitis |
| Hayfever | Lateral epicondylitis |
| Eczema | Acne |
| Sinusitis | Viral warts |
| Heartburn | Cold Sores |
| Crohns | Hearing Loss |
| Irritable Bowel Syndrome | Tinnitus |
| Diabetes | Glaucoma |
| Dyslexia | Cataract |
| Clinical Depression | Myopia |
| Anxiety | Age-related macular degeneration |
| Epilepsy | Urinary Incontinence |
| Stroke | Polycystic ovarian syndrome |
| Motion Sickness | Frozen Shoulder |
| Carpal Tunnel | Osteoporosis |
| Asthma |  |

**Supplementary Table 1:** Co-morbidities from general questionnaire

**Supplementary Table 2**: Factors found not significant for revision status (p >0.05).

| **Variables** | |
| --- | --- |
| Age first developed finger nodes | Back pain in past 3 months | |
| Number of finger nodes L-hand | Body pain (lasting >24 hours) in past 3 months | |
| Number of finger node R-hand | Finger nodes | |
| Age first developed finger pain | Writing hand | |
| Age | Finger pain for 1 month | |
| BMI | Thumb pain | |
| Menarche age | Mother OA | |
| Menopause age | Mother TJR | |
| Hysterectomy age | Father OA | |
| Sex | Father TJR | |
| Smoker | Sibling OA | |
| Oral contraceptive pill | Sibling TJR | |
| Hormone replacement therapy | Recurrent headaches | |
| Sit >2hr per average day at work | Frozen shoulder | |
| Stand/Walk >2hr per average day at work | Osteoporosis | |
| Knee >1hr per average day at work | Carpal tunnel | |
| Squat >1hr per average day at work | High cholesterol | |
| Drive >4hr per average day at work | Cardiovascular disease | |
| Walk >2 miles per average day at work | Asthma | |
| Eczema | Hypertension during pregnancy | |
| Sinusitis | Multi-site musculoskeletal pain | |
| Heartburn | Surgeon F6 Vs Other Surgeons (Excluding E5) | |
| Irritable bowel syndrome | Hybrid hip prosthesis VS others | |
| Diabetes | CS/CR hip prosthesis VS others | |
| Clinical depression | Myopia | |
| Anxiety | Urinary incontinence | |
| Motion sickness | Phlegm during winter | |
| Migraine | Phlegm most days for at least 3 months | |
| Cancer | Acid regurgitation | |
| Gout | Broken bone after turning 16 years old | |
| Bunions | Tinnitus | |
| Golfers elbow | Cataract | |
| Hearing loss |  | |
